# Supplementary material
Source: publisher site journal article supplement (https://www.kjim.org/upload/media/kjim-2022-208_suppl1.pdf)
Supplement: Supplementary file 1 [file kjim-2022-208_suppl1.pdf]

**Supplementary Table 1. Cox regression analysis to identify factors associated with cancer development in PJS patients**

| Variable                                                               | HR    | 95% CI       | <i>p</i> value |
|------------------------------------------------------------------------|-------|--------------|----------------|
| <b>Cancer</b>                                                          |       |              |                |
| Univariable analysis                                                   |       |              |                |
| Male sex                                                               | 1.251 | 0.518–3.022  | 0.619          |
| <i>STK11</i>                                                           | 1.255 | 0.350–4.501  | 0.728          |
| Family history of PJS                                                  | 2.236 | 0.778–6.425  | 0.135          |
| Intussusception                                                        | 2.801 | 1.108–7.078  | 0.030          |
| Multivariable analysis ( <i>p</i> value in univariable analysis < 0.2) |       |              |                |
| Male sex                                                               | -     | -            | -              |
| <i>STK11</i>                                                           | -     | -            | -              |
| Family history of PJS                                                  | 1.520 | 0.498–4.637  | 0.462          |
| Intussusception                                                        | 2.418 | 0.878–6.659  | 0.088          |
| <b>Gastrointestinal cancer</b>                                         |       |              |                |
| Univariable analysis                                                   |       |              |                |
| Male sex                                                               | 2.551 | 0.702–9.274  | 0.155          |
| <i>STK11</i>                                                           | 1.195 | 0.175–8.168  | 0.856          |
| Family history of PJS                                                  | 2.521 | 0.472–13.458 | 0.279          |
| Intussusception                                                        | 3.986 | 0.962–16.511 | 0.057          |
| Multivariable analysis ( <i>p</i> value in univariable analysis < 0.2) |       |              |                |
| Male sex                                                               | 2.161 | 0.585–7.984  | 0.248          |
| <i>STK11</i>                                                           | -     | -            | -              |
| Family history of PJS                                                  | -     | -            | -              |
| Intussusception                                                        | 3.514 | 0.843–14.657 | 0.085          |
| <b>Extra-gastrointestinal cancer</b>                                   |       |              |                |
| Univariable analysis                                                   |       |              |                |
| Male sex                                                               | 0.690 | 0.211–2.264  | 0.541          |
| <i>STK11</i>                                                           | 1.133 | 0.225–5.703  | 0.879          |
| Family history of PJS                                                  | 1.741 | 0.472–6.424  | 0.406          |
| Intussusception                                                        | 1.362 | 0.450–4.123  | 0.585          |
| Multivariable analysis ( <i>p</i> value in univariable analysis < 0.2) |       |              |                |
| Male sex                                                               | -     | -            | -              |
| <i>STK11</i>                                                           | -     | -            | -              |
| Family history of PJS                                                  | -     | -            | -              |
| Intussusception                                                        | -     | -            | -              |

PJS, Peutz-Jeghers syndrome; HR, hazard ratio; CI, confidence interval; *STK11*, serine/threonine kinase 11.
